# Supplementary material for: Temporal and spatial variability of ice cover occurrence on Carpathian rivers: A regional perspective
Source: Copernicus journal article supplement (doi:10.5194/hess-2024-368), 2025-01-21
Supplement: Supplementary file [file hess-2024-368-AC2-supplement.pdf]

Dear Professor Daniele Bocchiola,

Thank you for all your valuable comments and feedback on our manuscript. We agree with most of the suggestions and comments.

Due to the nature of most comments (editorial comments on the text), we do not address all comments separately, but instead post responses to comments where a question was raised or where we ask you to leave the text as is.

| <b>Reviewer comments</b>                               | <b>Location in text [lines]</b> | <b>Author's reply</b>                                                                                                                                                                                                                                                                                 |
|--------------------------------------------------------|---------------------------------|-------------------------------------------------------------------------------------------------------------------------------------------------------------------------------------------------------------------------------------------------------------------------------------------------------|
| Maybe "it intensifies the impact of climate change"?   | 21                              | We agree such wording will be much clearer. The text will be corrected this way.                                                                                                                                                                                                                      |
| -                                                      | 129-130,<br>142-143             | Unfortunately, due to handwriting and clipped letters during the scan, we are unable to read the reviewer's comments.                                                                                                                                                                                 |
| -                                                      | 228                             | We don't quite understand the reviewer's suggestion. However, we believe that the word "coincides" is appropriate in this context. If it is possible, please leave the text as it is.                                                                                                                 |
| uphrase this means                                     | 356                             | We agree with the reviewer that this statement may be unclear. This sentence will be corrected in the next version of the manuscript by removing the awkward part.                                                                                                                                    |
| I would say "without reservoirs upstream"              | 389                             | We agree that this is a better statement. The indicated excerpt will be corrected in accordance with the reviewer's recommendations.                                                                                                                                                                  |
| This is a hypothesis?                                  | 392-393                         | This is a fact demonstrated in many scientific studies in the Carpathian region. However, in its current form it is not clear, so we will add relevant citations to the text.                                                                                                                         |
| Not clear<br>This means presence of geothermal waters? | 398                             | We agree that the statement is not clear in this form. The passage refers to geothermal waters, and we will make this clear in the next version of the manuscript.                                                                                                                                    |
| Again "with no tourist infrastructure"                 | 400                             | We agree with the reviewer's opinion, the text will be revised accordingly.                                                                                                                                                                                                                           |
| How quantified?                                        | 451                             | This estimation was based on the XGBoost machine learning model. This information will be added to the text.<br>We believe that due to the extensive methodology, there is no need to provide more details in the text of this article - interested readers are referred to this article by citation. |
